# Supplementary material for: First-principles design of bifunctional oxygen reduction and evolution catalysts through bimetallic centers in metal–organic frameworks
Source: Royal Society of Chemistry journal article supplement (doi:10.1039/c8cy00675j), 2018-01-01
Supplement: c8cy00675j1.pdf [file c8cy00675j1.pdf]

## Supporting information

### **First-principles design of bifunctional oxygen reduction and evolution catalysts through bimetallic centers in metal-organic frameworks**

Peng Zhang<sup>1,3,4</sup>, Xuejing Yang<sup>1</sup>, Wang Gao<sup>2</sup>, Xiuli Hou<sup>1</sup>, Jianli Mi<sup>1</sup>, Lei Liu<sup>1</sup>, Jun  
Huang<sup>\*,4</sup>, Mingdong Dong<sup>\*,5</sup>, Catherine Stampfl<sup>\*,3</sup>

<sup>1</sup> *Institute for Advanced Materials, School of Materials Science and Engineering,  
Jiangsu University, Zhenjiang 212013, China*

<sup>2</sup> *School of Materials Science and Engineering, Jilin University, Changchun 130022,  
China*

<sup>3</sup> *School of Physics, The University of Sydney, Sydney, New South Wales 2006,  
Australia*

<sup>4</sup> *Laboratory for Catalysis Engineering, School of Chemical and Biomolecular  
Engineering, The University of Sydney, New South Wales 2006, Australia*

<sup>5</sup> *Interdisciplinary Nanoscience Center (iNANO), Aarhus University, Aarhus DK-  
8000, Denmark*

*\*E-mail: jun.huang@sydney.edu.au, dong@inano.au.dk,*

*catherine.stampfl@sydney.edu.au*

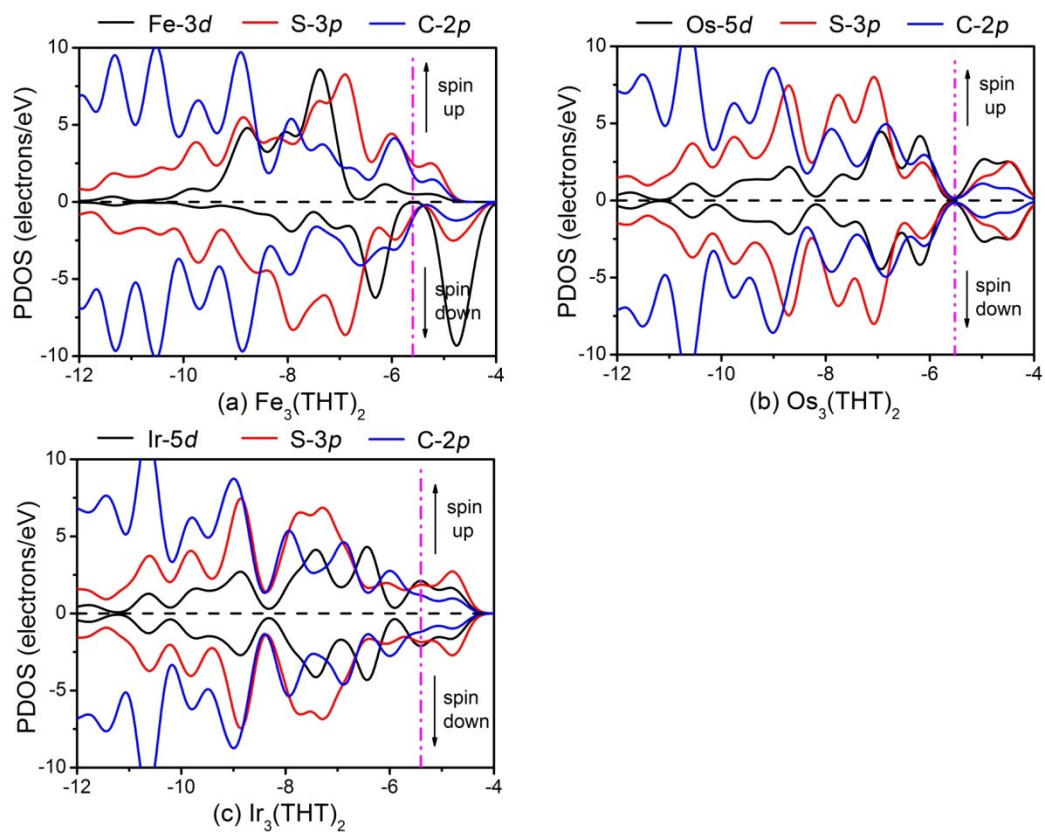

Fig. S1. Partial density of states (PDOS) of (a)  $\text{Fe}_3(\text{THT})_2$ , (b)  $\text{Os}_3(\text{THT})_2$ , and (c)

$\text{Ir}_3(\text{THT})_2$ .

Table S1. Adsorption energy ( $E_{ad}$ ) values of ORR intermediates and d-band center of  $M_3(\text{THT})_2$  nanosheets. All results are in the unit of eV. The corresponding adsorption structures are shown in Fig. S2.

| $E_{ad}$              | OOH  | O    | OH   | $\epsilon_d$ |
|-----------------------|------|------|------|--------------|
| Fe                    | 1.36 | 3.92 | 2.51 | -1.23        |
| Ru                    | 1.76 | 4.86 | 2.35 | -1.88        |
| Os                    | 1.96 | 5.59 | 3.18 | -2.05        |
| Co                    | 0.87 | 3.77 | 2.07 | -1.56        |
| Rh                    | 0.96 | 4.03 | 2.08 | -2.13        |
| Ir                    | 0.95 | 3.91 | 2.18 | -2.59        |
| Ni                    | 0.51 | 3.68 | 1.93 | -1.88        |
| Pd                    | 0.64 | 3.74 | 2.05 | -2.62        |
| Pt                    | 0.49 | 3.63 | 1.90 | -3.01        |
| Fe/Fe <sub>2</sub> Co | 1.37 | 3.95 | 2.52 | -1.14        |
| Co/Fe <sub>2</sub> Co | 0.89 | 3.56 | 2.07 | -1.56        |
| Fe/FeCo <sub>2</sub>  | 1.37 | 3.98 | 2.58 | -1.15        |
| Co/FeCo <sub>2</sub>  | 0.86 | 3.75 | 2.02 | -1.57        |

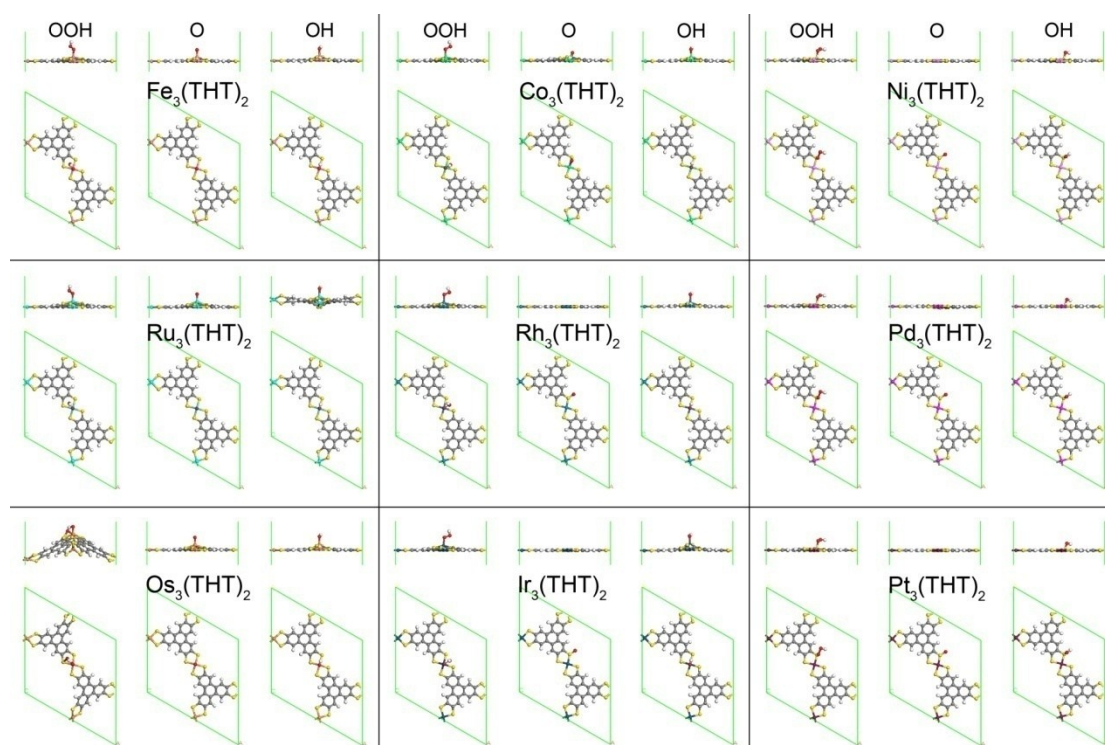

Fig. S2. Favorable adsorption structures of ORR intermediates on single-metal  $M_3(\text{THT})_2$  nanosheets.

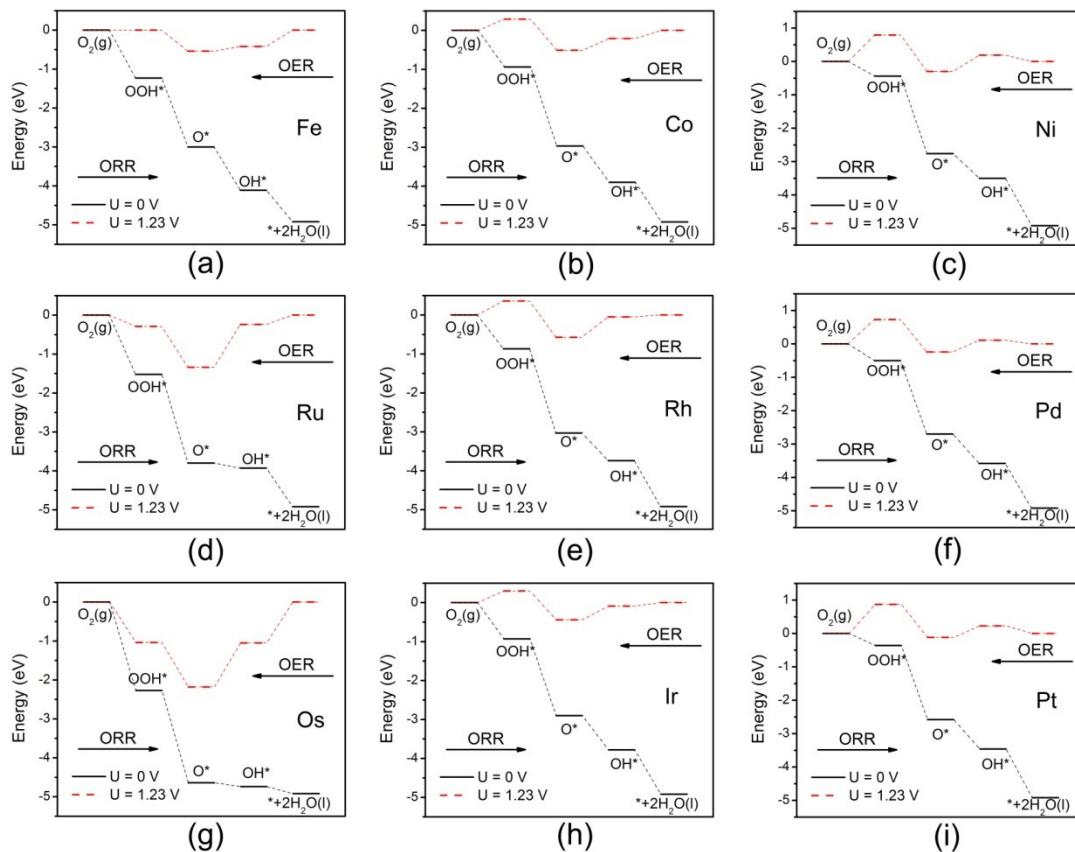

Fig. S3. Schematic free energy diagrams for ORR/OER on single-metal  $M_3(\text{THT})_2$  nanosheets.

Table S2. Mulliken charge analysis for  $\text{Fe}_3(\text{THT})_2$ ,  $\text{Co}_3(\text{THT})_2$ ,  $\text{Fe}_2\text{Co}(\text{THT})_2$  and  $\text{FeCo}_2(\text{THT})_2$  in units of  $e$ .

|                                      | Fe    | S-Fe <sup>a</sup> | Co    | S-Co <sup>a</sup> |
|--------------------------------------|-------|-------------------|-------|-------------------|
| $\text{Fe}_3(\text{THT})_2$          | 0.425 | -0.233            |       |                   |
| $\text{Co}_3(\text{THT})_2$          |       |                   | 0.147 | -0.161            |
| $\text{Fe}_2\text{Co}(\text{THT})_2$ | 0.424 | -0.234            | 0.148 | -0.161            |
| $\text{FeCo}_2(\text{THT})_2$        | 0.419 | -0.233            | 0.147 | -0.161            |

<sup>a</sup> S-Fe and S-Co indicate the S atoms bonded with Fe or Co atoms.

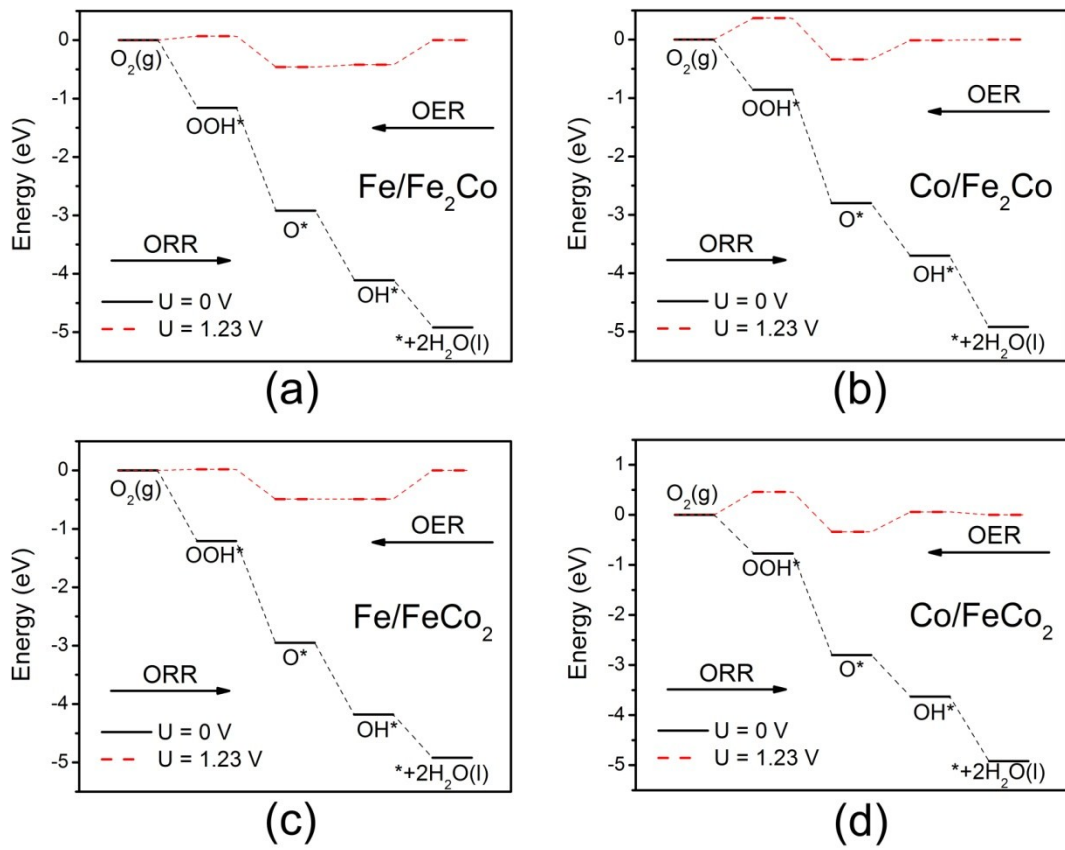

Fig. S4. Schematic free energy diagrams for ORR/OER on Fe<sub>x</sub>Co<sub>3-x</sub>(THT)<sub>2</sub>

nanosheets.

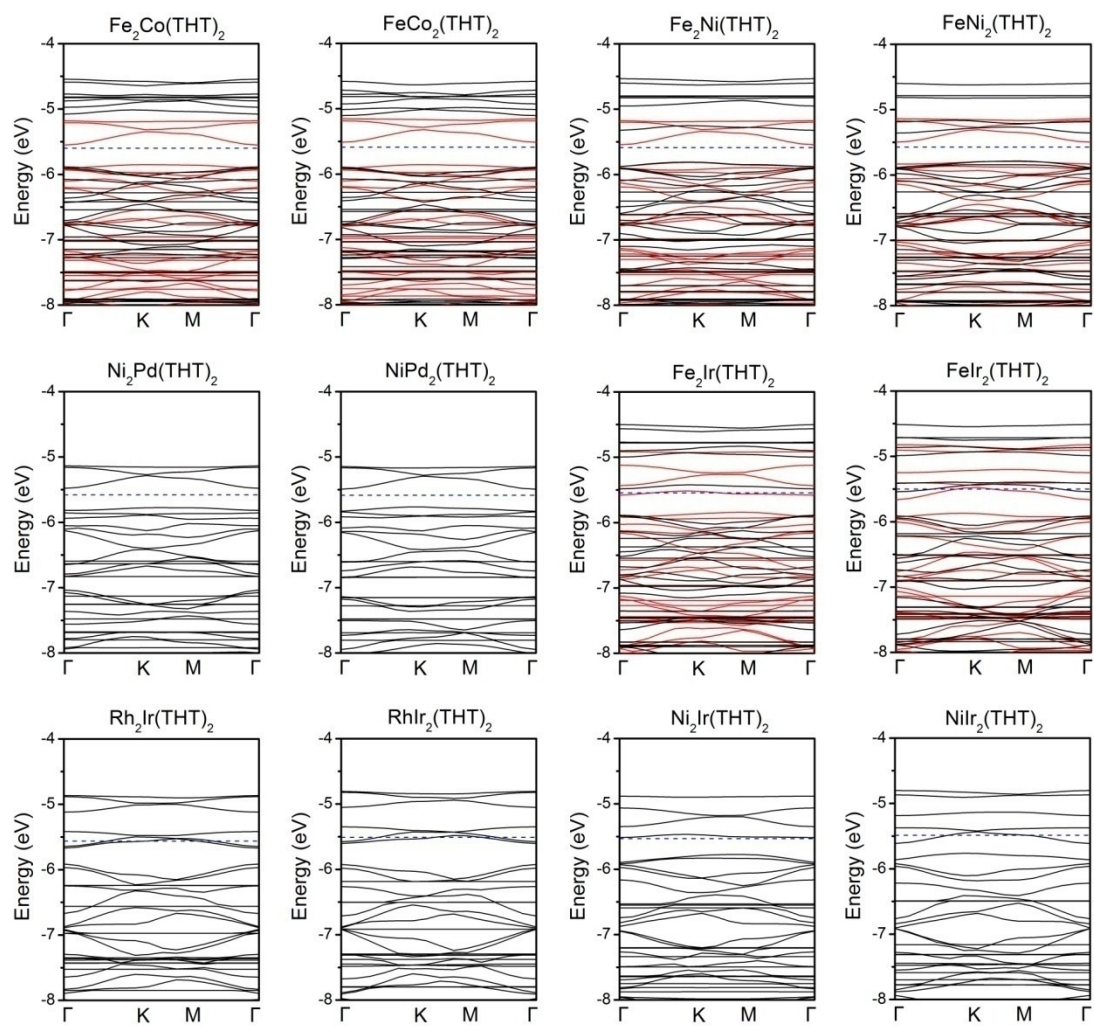

Fig. S5. The band structures of bi-metal  $M_3(\text{THT})_2$  nanosheets.

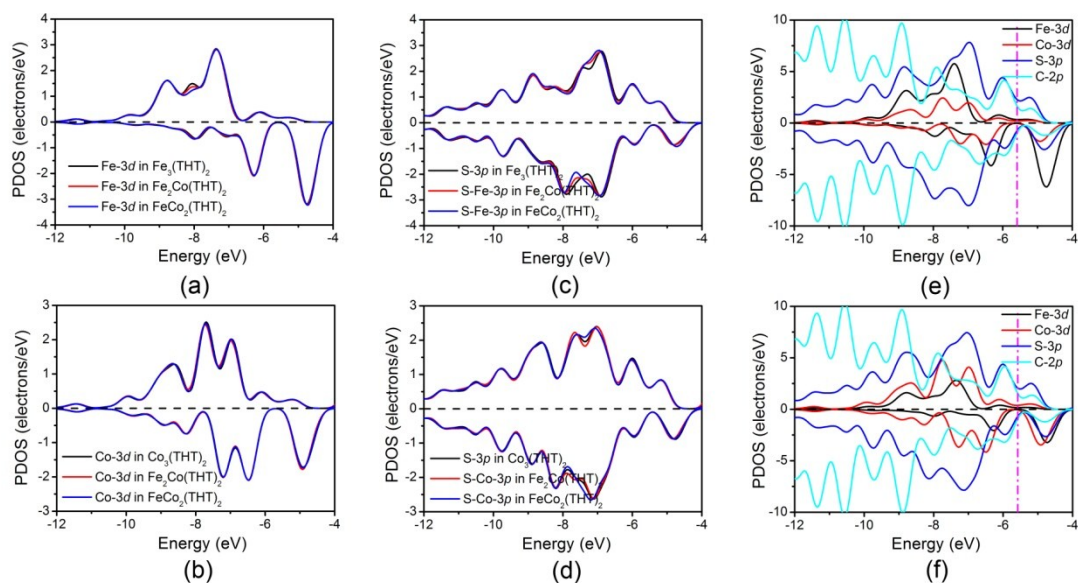

Fig. S6. Partial density of states (PDOS) of (a) Fe-3*d* in Fe<sub>3</sub>(THT)<sub>2</sub>, Fe<sub>2</sub>Co(THT)<sub>2</sub>, and FeCo<sub>2</sub>(THT)<sub>2</sub>, (b) Co-3*d* in Co<sub>3</sub>(THT)<sub>2</sub>, Fe<sub>2</sub>Co(THT)<sub>2</sub>, and FeCo<sub>2</sub>(THT)<sub>2</sub>, (c) S-3*p* of S atoms bonded with Fe atoms in Fe<sub>3</sub>(THT)<sub>2</sub>, Fe<sub>2</sub>Co(THT)<sub>2</sub>, and FeCo<sub>2</sub>(THT)<sub>2</sub>, (d) S-3*p* of S atoms bonded with Co atoms in Co<sub>3</sub>(THT)<sub>2</sub>, Fe<sub>2</sub>Co(THT)<sub>2</sub>, and FeCo<sub>2</sub>(THT)<sub>2</sub>, (e) Fe<sub>2</sub>Co(THT)<sub>2</sub>, and (f) FeCo<sub>2</sub>(THT)<sub>2</sub>.

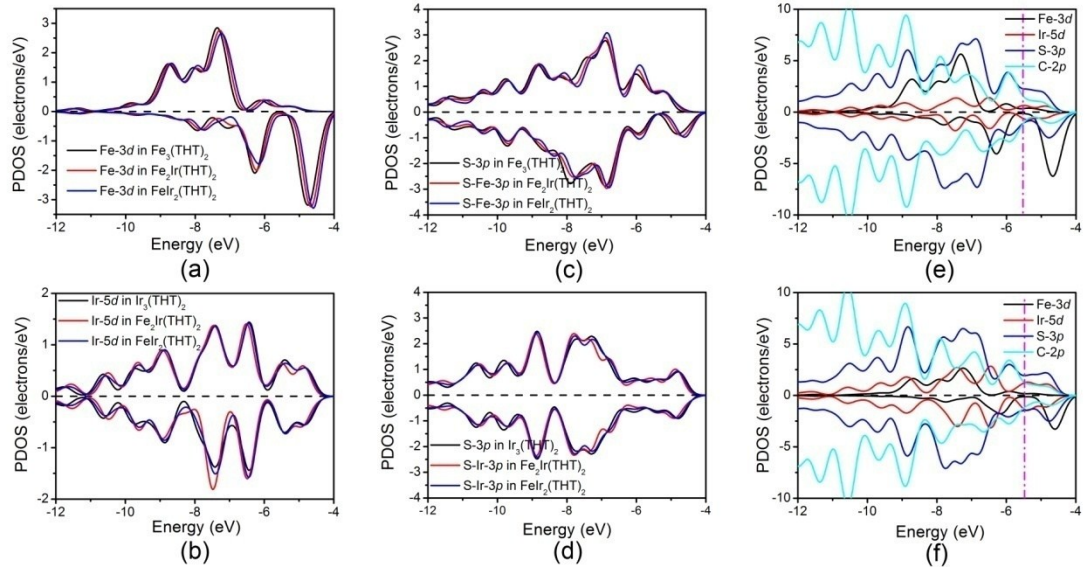

Fig. S7. Partial density of states (PDOS) of (a) Fe-3d in  $\text{Fe}_3(\text{THT})_2$ ,  $\text{Fe}_2\text{Ir}(\text{THT})_2$ , and  $\text{FeIr}_2(\text{THT})_2$ , (b) Ir-5d in  $\text{Ir}_3(\text{THT})_2$ ,  $\text{Fe}_2\text{Ir}(\text{THT})_2$ , and  $\text{FeIr}_2(\text{THT})_2$ , (c) S-3p of S atoms bonded with Fe atoms in  $\text{Fe}_3(\text{THT})_2$ ,  $\text{Fe}_2\text{Ir}(\text{THT})_2$ , and  $\text{FeIr}_2(\text{THT})_2$ , (d) S-3p of S atoms bonded with Co atoms in  $\text{Ir}_3(\text{THT})_2$ ,  $\text{Fe}_2\text{Ir}(\text{THT})_2$ , and  $\text{FeIr}_2(\text{THT})_2$ , (e)  $\text{Fe}_2\text{Ir}(\text{THT})_2$ , and (f)  $\text{FeIr}_2(\text{THT})_2$ .



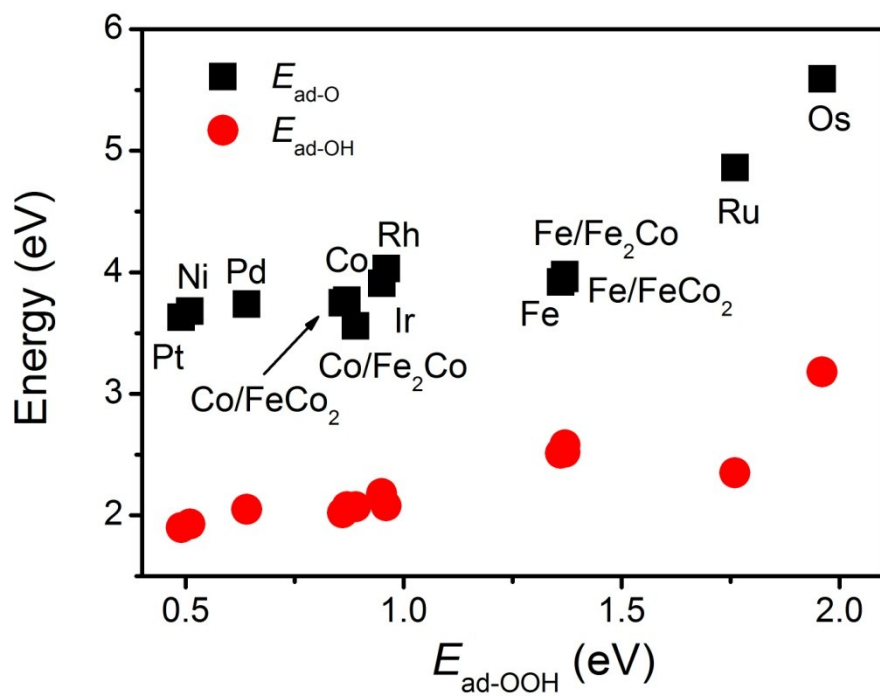

Fig. S8. Adsorption energies ( $E_{ad}$ ) of O and OH plotted against the  $E_{ad}$  of OOH on  $M_3(\text{THT})_2$  nanosheets.
